# Supplementary material for: Self-Starting Soliton–Comb Regimes in χ(2) Microresonators
Source: MDPI journal article supplement (doi:10.3390/photonics10060640), 2023-06-01
Supplement: s1 [file s1]

# Supplementary Materials: "Self-starting soliton-comb regimes in $\chi^{(2)}$ microresonators"

Sergey Smirnov<sup>1</sup>, Evgeni Podivilov<sup>2</sup> and Boris Sturman<sup>2</sup>

## 1. Whispering gallery modes

Optical whispering gallery modes (WGMs) exist in any axially symmetric body (sphere, spheroid, toroid, etc.) made of a transparent material [17,24-26]. Owing to the azimuth symmetry, all components of the light fields are proportional to  $\exp(im\varphi)$ , where  $\varphi$  is the azimuth angle and  $m$  is the azimuth number taking integer values. Typically, the vacuum wavelength  $\lambda = 2\pi c/\omega$  is much smaller than the major radius  $R$ , the azimuth number  $m \gg 1$ , and the light fields are strongly localized near the rim. Exact WGM solutions to the Maxwell equations with true boundary conditions are available only for the spherical case [24,25]. In other practically important cases, including the  $\chi^{(2)}$  case, approximate solutions, employing smallness of the ratio  $\lambda/R$ , are in use [24,27-30]. While the radiation damping of WGMs is present, it is negligibly small for typical values of the refractive index  $n$  and  $\lambda \ll R$ , such that the modal decay is due to the bulk absorption and roughness of the surface. Typical modal Q-factors are as high as  $10^7 - 10^9$ , correspondingly, the modal line widths are in the MHz range.

Generally, there are two polarization types of WGMs, and each type is characterized (in addition to  $m$ ) by two modal numbers – the radial number  $q = 1, 2, \dots$  and the polar number  $p = 0, 1, \dots$ . For each polarization type, the modal frequency can be represented as  $\omega = k_m c/n$ , where  $k_m = m/R$  and  $n = n(m, q, p)$  is the effective modal refractive index. For  $\lambda \ll R$ , the modal index is close to its bulk value  $n_b(\lambda)$  and  $m \simeq 2\pi R n_b / \lambda$ . Thus, WGMs can be viewed as quasi-plane waves propagating along the rim with discrete wavevectors  $k_m$  and possessing refractive indices slightly dependent on the modal numbers. Within the optical range, the azimuth numbers are  $\sim 10^4$ . The intermodal distance measured in Hz,  $\delta\omega/2\pi = c/2\pi R n$ , is named the free spectral range. It corresponds  $\delta\lambda/\lambda = \lambda/2\pi R n \ll 1$ .

The case of uniaxial (birefringent) medium with the optic axis coinciding with the axial one is typical for  $\chi^{(2)}$  resonators. Here the modal polarization is either ordinary (o) or extraordinary (e), and the corresponding refractive indices are  $n_o$  and  $n_e$ . As WGMs are localized near the rim, knowledge of its minor radius  $r$  is usually sufficient to calculate  $n_{o,e}(m, q, p)$  with a good accuracy. The corresponding relation for the geometric dispersion reads [17,29]

$$\frac{n_b - n}{n_b} \simeq \frac{\zeta_q}{2^{1/3} m^{2/3}} + \frac{(2p+1)\sqrt{R}}{2m\sqrt{r}}, \quad (1)$$

where  $\zeta_q$  is  $q$ -th zero of the Airy function  $\text{Ai}(-\zeta)$ , such that  $\zeta_1 \simeq 2.338$ ,  $\zeta_2 \simeq 4.088$ , etc. The right-hand side of Eq. (1) represents two first terms of an asymptotic expansion in fractional powers of  $1/m$ . The higher-order terms of this expansion usually are not necessary for evaluation of  $\delta n = n - n_b$ . Because of the above link between  $m$  and  $\lambda$ , one can easily represent  $\delta n$  as a function of  $\lambda$ . Equation (1) is useful for analysis of the effects of geometric dispersion, including the phase matching and minimization of the temporal walk-off. It has to be supplemented by proper empiric Sellmeier equations for  $n_b(\lambda)$  [49].

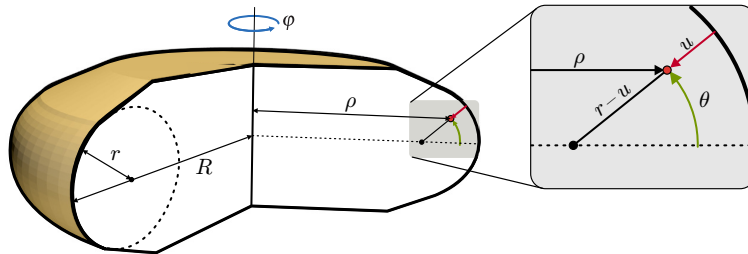

**Figure S1.** Geometry of the problem;  $R$  and  $r$  are the major and minor radii of the resonator, while  $u$ ,  $\theta$ , and  $\varphi$  are the curvilinear coordinates, and  $\rho = \rho(u, \theta)$  is the distance from the observation point (shown by the red dot) to the vertical rotational axis.

In addition to polarization and frequency, each mode can be characterized by the modal function  $\Psi_{m,q,p}(\mathbf{r}) = \exp(im\varphi) \psi_{m,q,p}(\mathbf{r}_\perp)$ , where  $\mathbf{r}_\perp$  refers to the transverse cross-section  $\varphi = \text{const}$ . The pre-exponent ensures orthogonality

of two wave functions with different azimuth numbers. The functions  $\psi_{m,q,p}(\mathbf{r})$ , that can be chosen real, obey the orthogonality relation

$$\int \psi_{m,q,p}(\mathbf{r}_\perp) \psi_{m,q',p'}(\mathbf{r}_\perp) d\mathbf{r}_\perp = \delta_{qq'} \delta_{pp'}. \quad (2)$$

Obviously,  $\psi_{m,q,p}(\mathbf{r}_\perp)$  has the dimension of  $r^{-1}$ . The overlap integral  $\sigma_{\text{eff}}^{-1/2} = \int \psi_{m_2,q_2,p_2} \psi_{m_1,q_1,p_1}^2 d\mathbf{r}_\perp$ , that occurs in calculations of elementary  $\chi^{(2)}$  processes [31], can be regarded as inverse square root of the interaction cross-section  $\sigma_{\text{eff}}$ .

The modal function  $\psi_{m,q,p}$  can be calculated within the model of Fig. ?? . More specifically, it is proportional to  $U(u)$  and  $\Theta(\theta)$ , where  $u$  is the radial distance to the rim and  $\theta$  is the azimuth angle measured from equator. Analysis of the scalar Helmholtz equation for the light field in curvilinear coordinates  $u, \theta$  results in relations [29]

$$U = U_{m,q} = \text{Ai}\left(\frac{u}{u_m} - \zeta_q\right), \quad \Theta = \Theta_{m,p} = \exp\left(-\frac{\theta^2}{2\theta_m^2}\right) H_p\left(\frac{\theta}{\theta_m}\right), \quad (3)$$

where  $u_m = R/2^{1/3}m^{2/3}$ ,  $\theta_m = (R/r)^{3/4}/m^{1/2}$ , and  $H_p(x)$  is the Hermitian polynomial of the order  $p$ . For  $m \gg 1$ , both the modal function is strongly localized in  $u$  and  $\theta$ . Note that  $U(0) = 0$ , i.e., strongly decaying evanescent fields for  $u < 0$  are ignored. More accurate and cumbersome relations are available as well. Equations (??) are useful to evaluate modal overlap integrals entering relations for the nonlinear coupling constants.

## 2. Impact of geometric dispersion on natural PM and walk-off in LN resonators

Here we use temperature dependent Sellmeier relations of [55] for  $n_{o,e}^b(\lambda)$  relevant to congruent LN crystals doped with Mg. These crystals are most suitable for manufacturing microresonators. Consider two spectral characteristics – the phase velocity  $V = \omega(k)/k$  and the group velocity  $v = d\omega/dk$  – relevant to o and e polarizations. With  $n(\lambda)$  known, we have  $V = c/n$  and  $v = c/(n - \lambda n')$  with  $n' = dn/d\lambda$ . The velocity differences  $V_{12} = V_o(\lambda_1) - V_e(\lambda_1/2)$  and  $v_{12} = v_o(\lambda_1) - v_e(\lambda_1/2)$ , where  $\lambda_1$  is the FH wavelength, characterize the birefringent mismatch and temporal walk-off, respectively. At  $V_{12}(\lambda_1) = 0$  we have a perfect natural (birefringent) phase matching.

Let us neglect first the geometric dispersion. Figures ??a and ??b show the dependences  $V_{12}(\lambda_1)$  and  $v_{12}(\lambda_1)$ , respectively, for two representative values of the temperature  $T$ . The ratio  $V_{12}/c$  is relatively small. The function  $V_{12}(\lambda_1)$

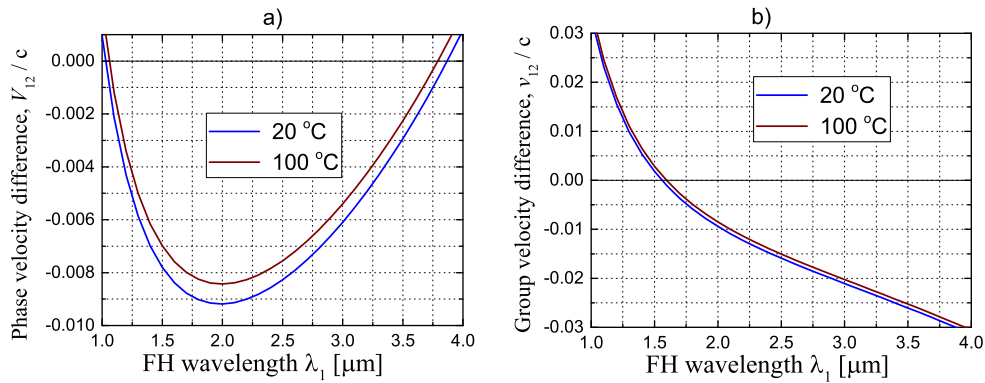

**Figure S2.** The bulk case: Wavelength dependences of  $V_{12}$  (a) and  $v_{12}$  (b) for  $T = 20$  and  $100$  °C.

turns to zero for  $\lambda_1$  slightly exceeding  $1 \mu\text{m}$ ; the PM point shifts slowly to the right with increasing  $T$ . Just this region is typically used for the natural PM. However, the group velocity difference  $v_{12}$  is pretty large in this range. On the other hand,  $v_{12}(\lambda_1)$  turns to zero for  $\lambda_1 \simeq 1.58 \mu\text{m}$ ; this is far from the point of natural PM. Note also, that the effect of  $T$  on  $v_{12}(\lambda_1)$  is relatively weak.

Now we include the effects of geometric dispersion into consideration using Eq. (??). Solid lines in Figs. ??a and ??b show dependences of  $V_{12}/c$  and  $v_{12}/c$ , respectively, on the FH wavelength  $\lambda_1$  for  $T = 20$  °C,  $R = 1$  mm,  $r = 0.25$  mm,  $q_e = 1$ , and three representative values of  $q_o$ . The dashed lines, given for comparison, correspond to the bulk case. We see that the influence of the geometric dispersion on  $V_{12}(\lambda_1)$ , subfigure ??a, is pretty strong: With increasing  $q_o$  the curves shift up and left, such that the area between the PM points shrinks. For sufficiently large values of  $q_o$  and  $T$  the phase matching becomes impossible. As concerned the dependence  $v_{12}(\lambda_1)$ , it experiences only modest changes: the zero walk-off point shifts slowly to the right with increasing  $q_o$ .

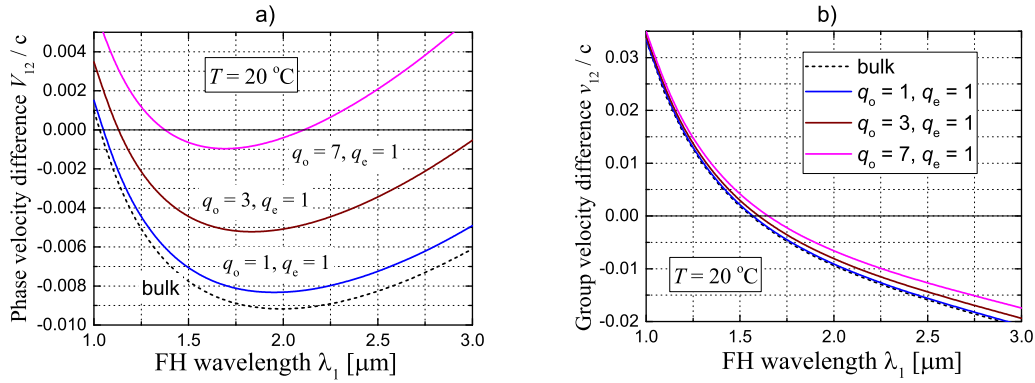

**Figure S3.** Dependences  $V_{12}(\lambda_1)/c$  (a) and  $v_{12}(\lambda_1)/c$  (b) for  $R = 1$  mm,  $r = 0.25$  mm,  $T = 20^\circ\text{C}$ ,  $q_e = 1$ , and  $q_o = 1, 3$ , and  $7$ . The dashed lines correspond to zero geometric dispersion.

Using the above described features of  $V_{12}(\lambda_1, T)$  and  $v_{12}(\lambda_1, T)$ , it is possible to achieve simultaneously a good birefringent phase matching and a small walk-off. To demonstrate this possibility, it is useful to introduce the frequency detuning  $\Delta_0 = \omega_2 - 2\omega_1$  instead of  $V_{12}$  and the ratio  $v_{12}/R$ . Both these parameters have to be normalized to the same modal decay rate  $\gamma$ . Solid lines 1 and 2 in Fig. ?? show  $\lambda_1$ -dependences of these mismatch and walk-off parameters for  $q_o = 8, q_e = 1$ , and  $T = 30.4212^\circ\text{C}$ . The dotted line 1' shows what happens with  $\Delta_0(\lambda_1)/c$  when the temperature changes to  $30.4215^\circ\text{C}$ ; it demonstrates a high sensitivity of our adjustment. Within the whole shown range of  $\lambda_1$ , both  $\Delta_0/\gamma$  and

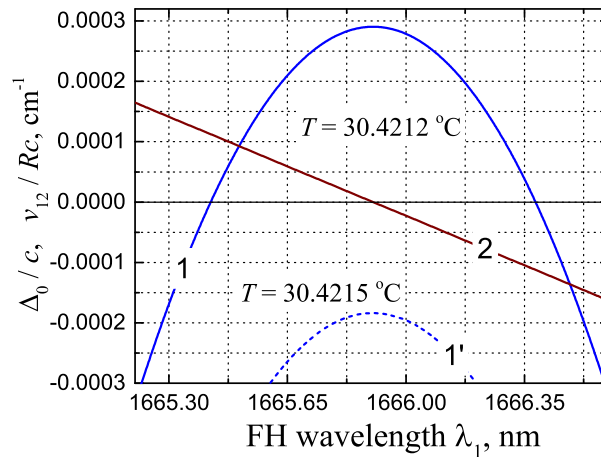

**Figure S4.** Dependences  $\Delta_0(\lambda_1)/c$  (curve 1) and  $v_{12}(\lambda_1)/cR$  (curve 2) for  $R = 1$  mm,  $r = 0.25$  mm,  $T = 30.4212^\circ\text{C}$ ,  $q_o = 8$ , and  $q_e = 1$ . The dashed curve 1' corresponds to  $\Delta_0(\lambda_1)/c$  at  $T = 30.4215^\circ\text{C}$ ; mismatch points are absent here. The corresponding dashed curve for  $v_{12}(\lambda_1)/Rc$  practically coincides with curve 2.

$v_{12}/\gamma R$  are  $\lesssim 1$  for  $\gamma \approx 10^7 \text{ s}^{-1}$ . Note that the wavelength distance between neighboring modes,  $\delta\lambda \simeq \lambda^2/2\pi Rn$ , is about 0.2 nm for parameters of Fig. ??, so that several discrete modes are available. It is possible also to make a similar adjustment for  $q_o = 7$  (instead of 8). This leads to much higher necessary temperatures,  $T \simeq 118.412^\circ\text{C}$ .

### 3. The effect of radial poling

The quadratic nonlinear optical response of ferroelectric  $\chi^{(2)}$  materials, like  $\text{LiNbO}_3$  or  $\text{LiTaO}_3$ , is determined by the independent real components  $d_{333}$  and  $d_{311}$  of the third-rank quadratic susceptibility tensor  $\hat{d}$  [13]. These components change sign under inversion of the direction of the spontaneous polarization. In the case of perfect radial poling, any of these components (let it be  $d$  with the bulk value  $d_0$ ) changes periodically its sign with the azimuth angle  $\varphi$ , as illustrated by Fig. ??a for the number of periods  $\mathcal{N} = 4$ . At the same time, the linear susceptibility tensor and the linear optical properties stay unchanged. If  $\mathcal{N}$  is the number of the alternation periods, the function  $d(\varphi)$  is  $2\pi/\mathcal{N}$ -periodic and it can be expanded in the Fourier series, as given by Eq. (6) of the main text. In the case of  $\pm$  symmetric domain structure, which is the most suitable for quasi-phase matching, only the Fourier harmonics with numbers  $s = \pm\mathcal{N}, \pm3\mathcal{N}, \dots$  are nonzero.

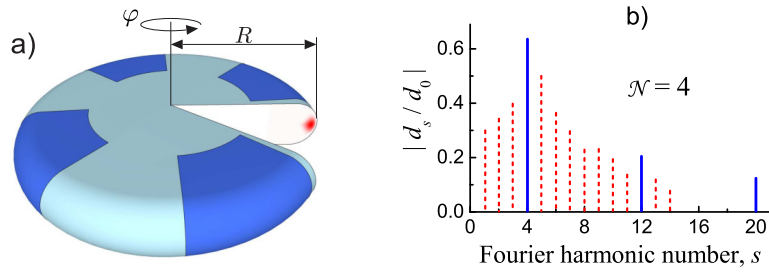

**Figure S5.** a) Schematic of a periodically poled microresonator of radius  $R$  for  $\mathcal{N} = 4$ . Different colors indicate the radial poling and the red spot indicates localization of light near the rim. b) Blue peaks show the first three harmonics of the corresponding Fourier spectrum with  $s = \mathcal{N}, 3\mathcal{N}$ , and  $5\mathcal{N}$ . Red peaks illustrate occurrence of unwanted Fourier harmonics in the case an imperfect radial poling.

For these harmonics, the reduction factor  $|d_s/d_0| = 2\mathcal{N}/\pi|s|$  decreases with increasing  $|s|$ , but remains comparable with 1 for  $|s| = \mathcal{N}$ , see also Fig. ??b.

Any disturbance of the  $2\pi/\mathcal{N}$  periodicity of the domain structure leads to decrease of the primary Fourier harmonics  $d_{\mathcal{N}}, d_{3\mathcal{N}}, \dots$  and also to additional Fourier harmonics  $d_s$  with  $s \neq \mathcal{N}, 3\mathcal{N}, \dots$ . Strong enough distortions can suppress the primary nonlinear phenomena and cause unwanted parasitic nonlinear processes. One of the most dangerous perturbations of the periodicity is off-centering of the radial structure [15]. The well-spread linear poling in commercially available samples of  $\text{LiNbO}_3$  crystals, is also not suitable for the  $\chi^{(2)}$  comb generation.

Consider in some details parameters of the radial poling necessary to achieve the quasi-phase matching near the zero walk-off point  $\lambda_2 = \lambda_c \simeq 1.349 \mu\text{m}$  for the e-polarized modes. The SH generation conditions in the terms of  $\lambda_2$  read

$$\frac{n(\lambda_2) - n(2\lambda_2)}{\lambda_2} = \frac{\mathcal{N}}{2\pi R} \equiv \frac{1}{\Lambda}, \quad (4)$$

where  $\Lambda$  is the period of poling of the rim and  $n = n_e$ . Figure ?? shows dependence  $\Lambda(\lambda_2)$  corresponding to this formula.

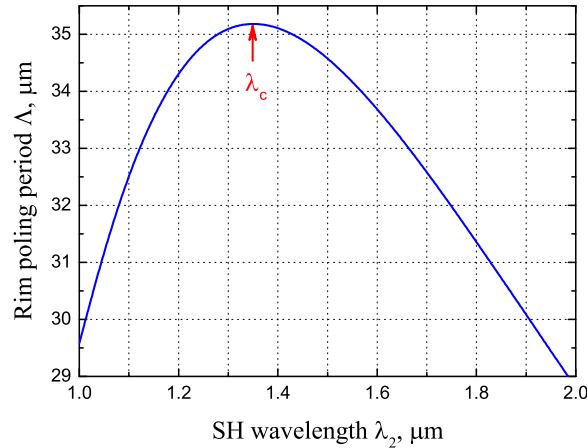

**Figure S6.** Rim poling period  $\Lambda$  versus the SH wavelength  $\lambda_2$ . The maximum value  $\Lambda_{\text{max}} \simeq 35.2 \mu\text{m}$  corresponds to the wavelength  $\lambda_c \simeq 1349 \text{ nm}$ .

Remarkably, the maximum value of  $\Lambda$  corresponds with a good accuracy to  $\lambda_c \simeq 1.349 \mu\text{m}$ . The values of  $\Lambda$  of this scale are accessible for the existing poling techniques. Furthermore, we can estimate  $\mathcal{N}$  as 284 for the circumference  $2\pi R \simeq 1 \text{ cm}$ .

It is necessary to keep in mind that the above estimates are approximate, for they ignore discreteness of  $m_{1,2}$  and  $\mathcal{N}$ . To get more insights, we represent  $m_1$  and  $\mathcal{N}$  as

$$m_1 = \frac{\pi R n(2\lambda_2)}{\lambda_2} \quad \text{and} \quad \mathcal{N} = \frac{2\pi R [n(\lambda_2) - n(2\lambda_2)]}{\lambda_2} \quad (5)$$

and consider dependences  $\mathcal{N}(\lambda_2)$  and  $m_1(\lambda_2)$  within a 20 nm interval around  $\lambda_c$ . The azimuth number  $m_1$  passes many  
 ( $\sim 10^1$ ) integer values within this interval and weak variations of  $R$  do not matter. The situation with  $\mathcal{N}$  is different.  
 In particular, for the circumference  $2\pi R = 1$  cm we have  $\mathcal{N} \simeq 284.019$  across the whole spectral interval, so that the  
 choice of  $R$  is essential to get an integer value of  $\mathcal{N}$ . In other words, fulfillment of the PM condition at  $\lambda_2 \simeq \lambda_c$  can be  
 accomplished only within some narrow windows of  $R$ . As  $\mathcal{N}$  and  $m_1$  are integers,  $m_2$  is automatically an integer.

In any case, Eqs. (??) cannot be satisfied simultaneously without the conventional fine tuning means, such as the  
 temperature or field tuning. With the tuning means, quasi-phase matching becomes possible. By analyzing the effects of  
 fine tuning, it is necessary to keep in mind that when changing the refractive indices  $n(\lambda_2)$  and  $n(2\lambda_2)$  we shift slightly  
 the zero walk-off point  $\lambda_c$ . Furthermore, employment of fine tuning means can lead to changes of  $R$ . Further details are  
 beyond the scope of this section.
